# Supplementary material
Source: publisher figshare collection journal article supplement (https://acs.figshare.com/ndownloader/files/3865642)
Supplement: Supplementary file 1 [file 3865642]

# Dispersion of asphaltenes in petroleum with ionic liquids- evaluation of molecular interactions in the binary mixture

*Adeniyi S. Ogunlaja\*, Eric Hosten and Zenixole R. Tshentu*

Department of Chemistry, Nelson Mandela Metropolitan University, P.O. Box 77000, Port-Elizabeth  
6031, South Africa

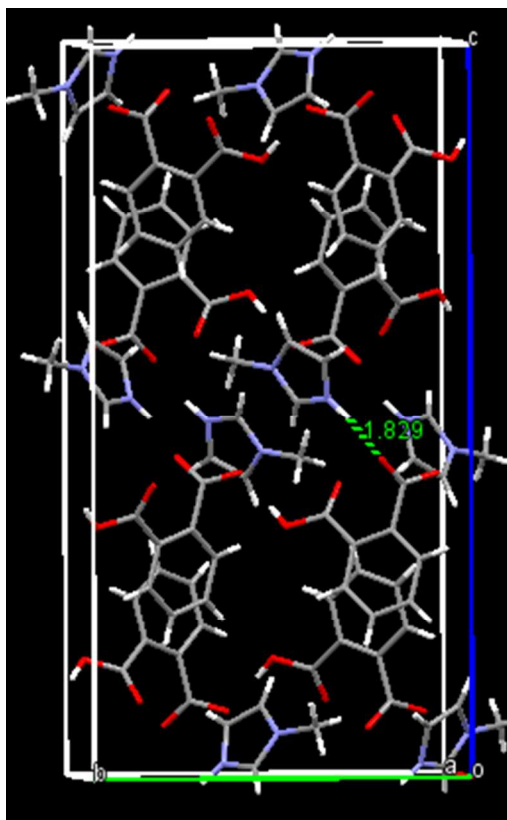

Figure S1. Crystal packing of 1-methyl-1*H*-imidazol-3-ium 2-carboxybenzoate showing short N(22)-H...O(14) contacts of 1.83 Å.

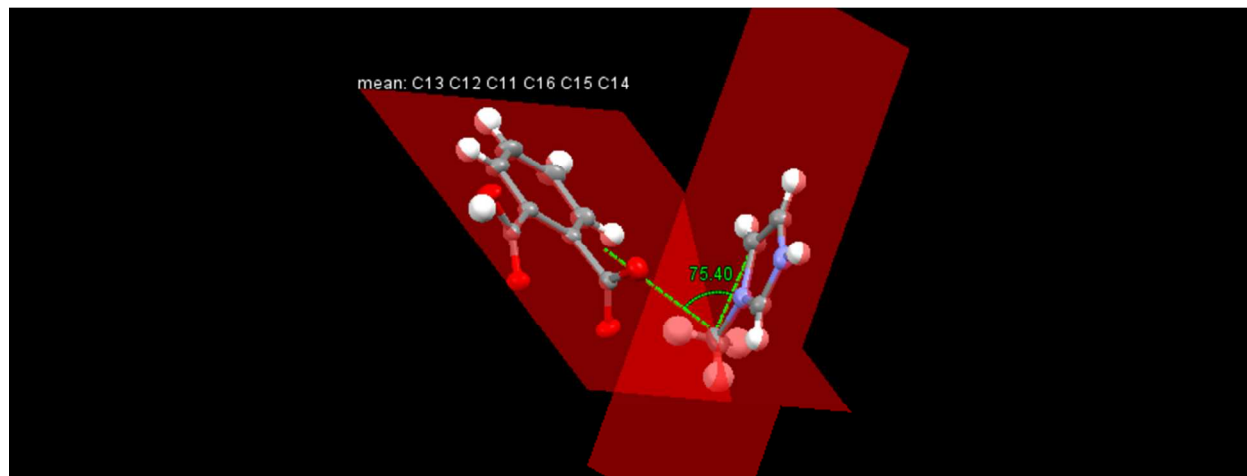

Figure S2. Structure of 1-methyl-1*H*-imidazol-3-ium 2-carboxybenzoate showing the angular plane between the imidazolium cation and carboxylate anion.

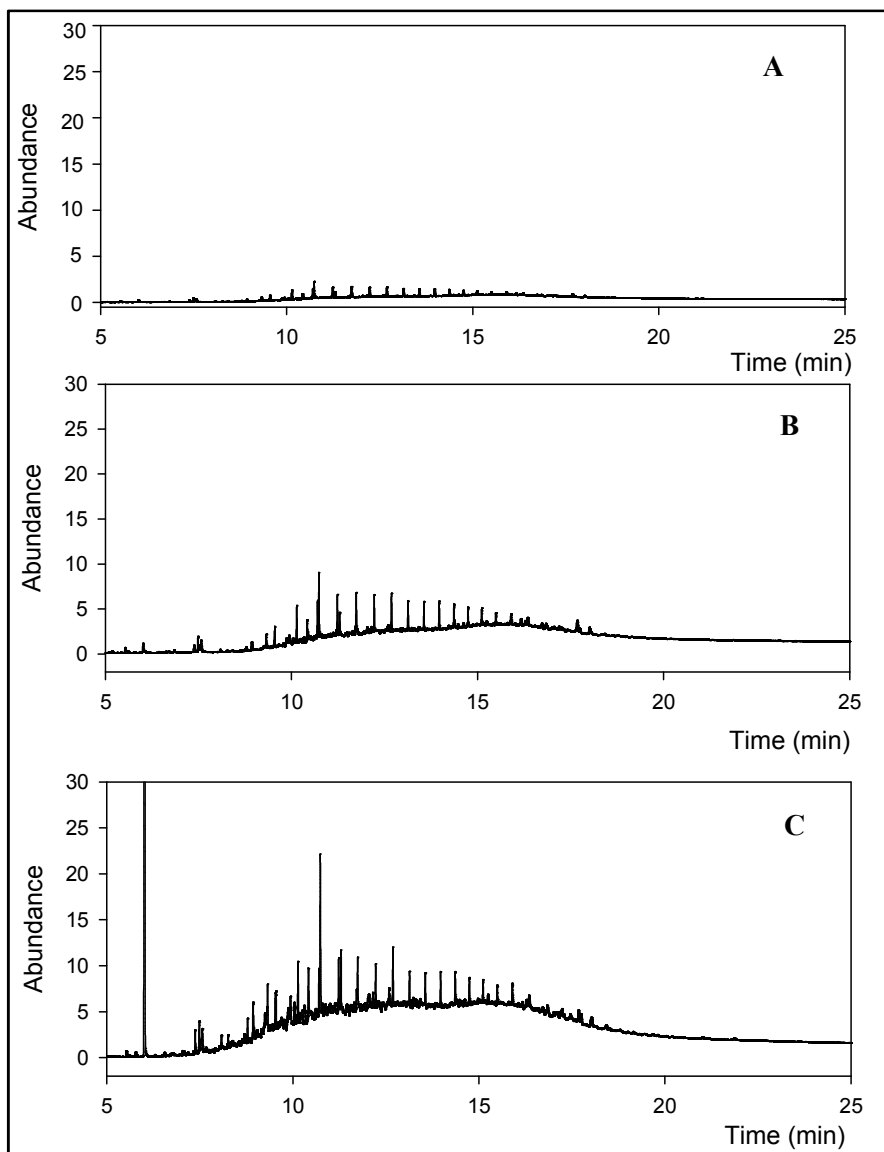

Figure S3. GC-FID chromatograms of precipitates obtained when employing 1-butyl-3-methylimidazolium chloride of (A) 9 equiv (B) 5 equiv. and (C) 2 equiv.

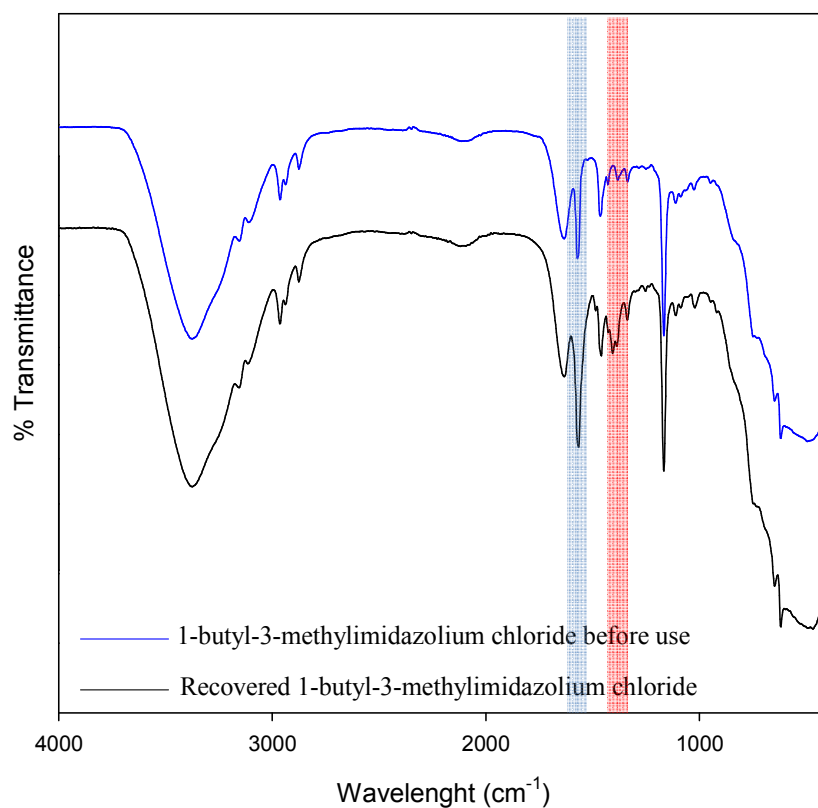

Figure S4. FT-IR of 1-butyl-3-methylimidazolium chloride before and after use (recovered). The recovered 1-butyl-3-methylimidazolium chloride gave two characteristic new bands. The blue line around 1574 cm<sup>-1</sup> show an increase in the intensity of the -C=C- bands of the ionic liquid and the red line show the appearance of a new band around 1379 cm<sup>-1</sup> which is characteristic of the C-N band attributed to asphaltenes.

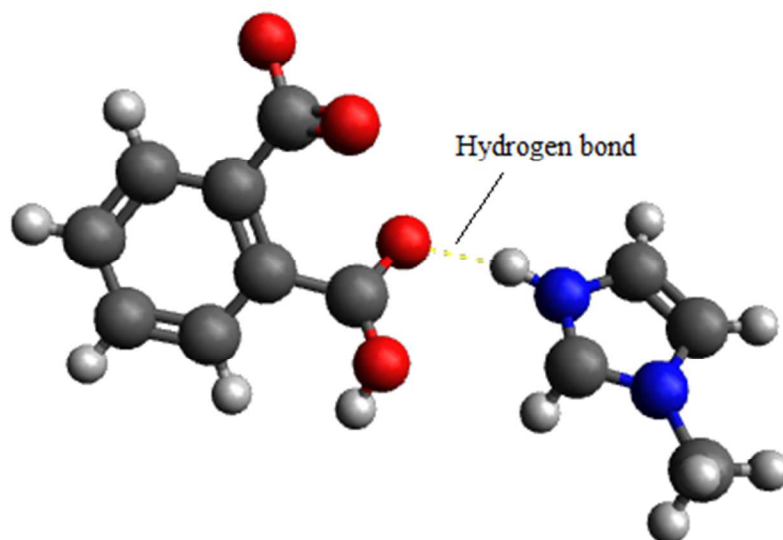

Figure S5. Optimised geometry of 1-methyl-1*H*-imidazol-3-ium 2-carboxybenzoate showing hydrogen bonding interaction (Avogadro software).

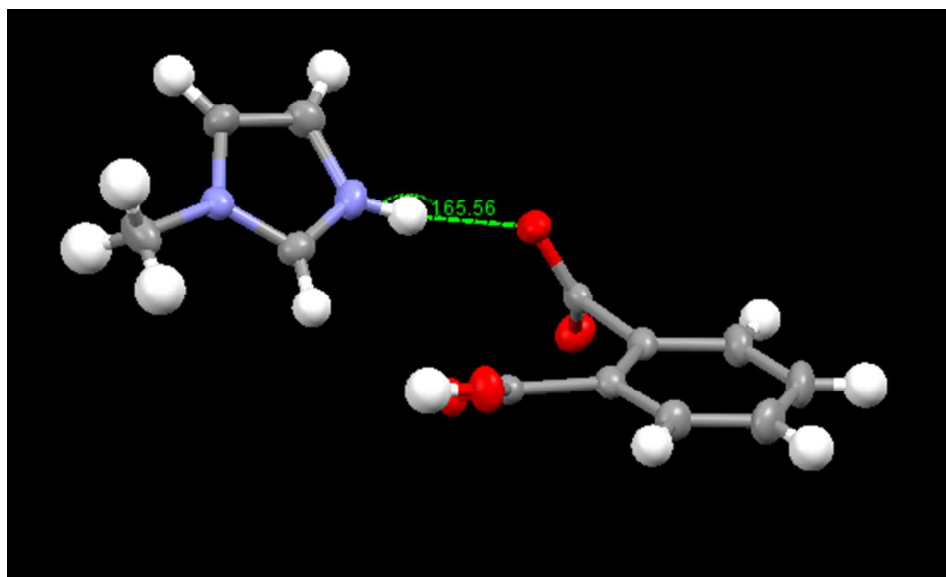

Figure S6. A contact angle between the cation and anion of 1-methyl-1*H*-imidazol-3-ium 2-carboxybenzoate

**Table S1.** DFT molecular modelling thermodynamic data ( $\Delta H$  and  $\Delta G$ ) of ionic liquids 1-butyl-3-methylimidazolium chloride, 1-butyl-3-methylimidazolium nitrate, 1-methyl-1*H*-imidazol-3-ium-2-carboxybenzoate and asphaltenes.

|                                                       | $\Delta H$ (kcal.mol <sup>-1</sup> ) | $\Delta G$ (kcal.mol <sup>-1</sup> ) |
|-------------------------------------------------------|--------------------------------------|--------------------------------------|
| 1-butyl-3-methylimidazolium chloride                  | -554291.2                            | -554326.5                            |
| 1-butyl-3-methylimidazolium nitrate                   | -441389.6                            | -441429.2                            |
| 1-methyl-1 <i>H</i> -imidazol-3-ium-2-carboxybenzoate | -548864.1                            | -548905.8                            |
| Asphaltenes                                           | -1939021.3                           | -1939112.1                           |

**Molecular modelling data for proposed asphaltene structure 2.**

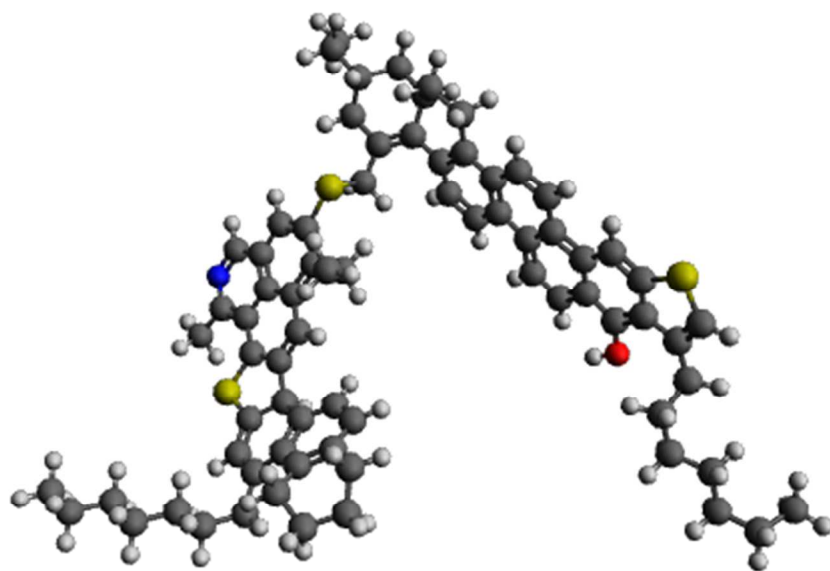

**Figure S7.** Structure of proposed asphaltene (2). Red, blue, yellow and grey colours represent oxygen, nitrogen, sulfur and carbon atoms respectively

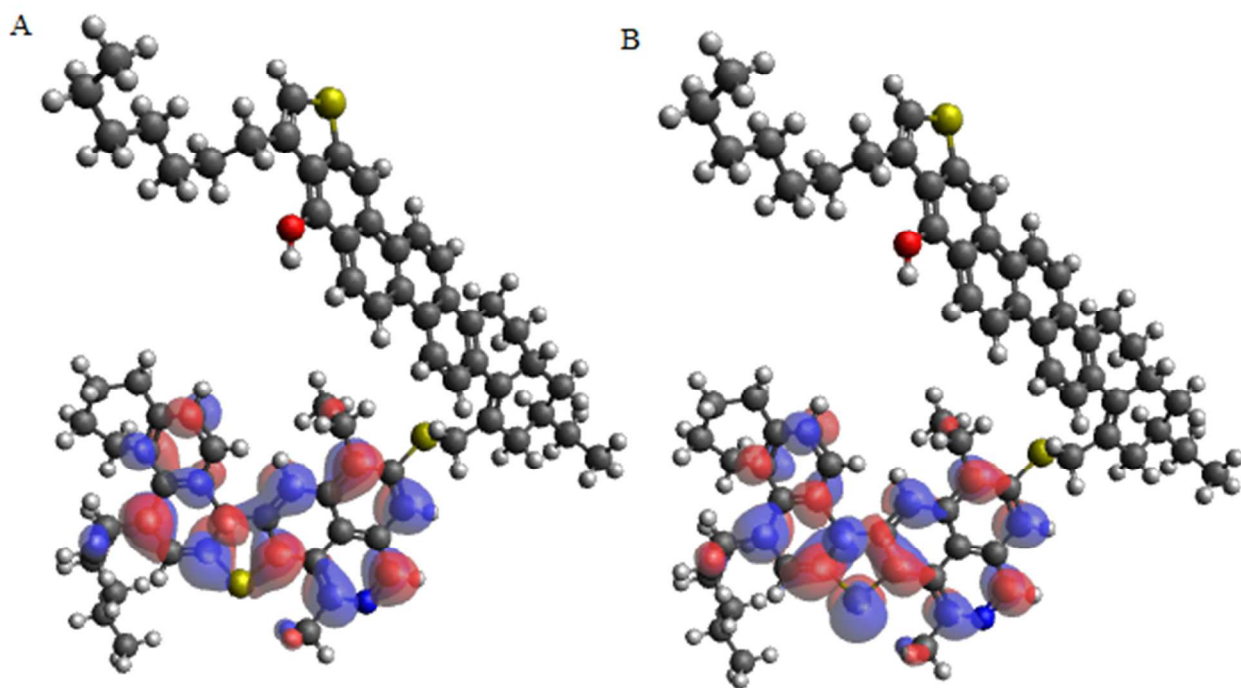

**Figure S8.** HOMO and LUMO locations of proposed asphaltene structure 2: (a) HOMO and (b) LUMO. Red, blue, yellow and grey colours represent oxygen, nitrogen, sulfur and carbon atoms respectively

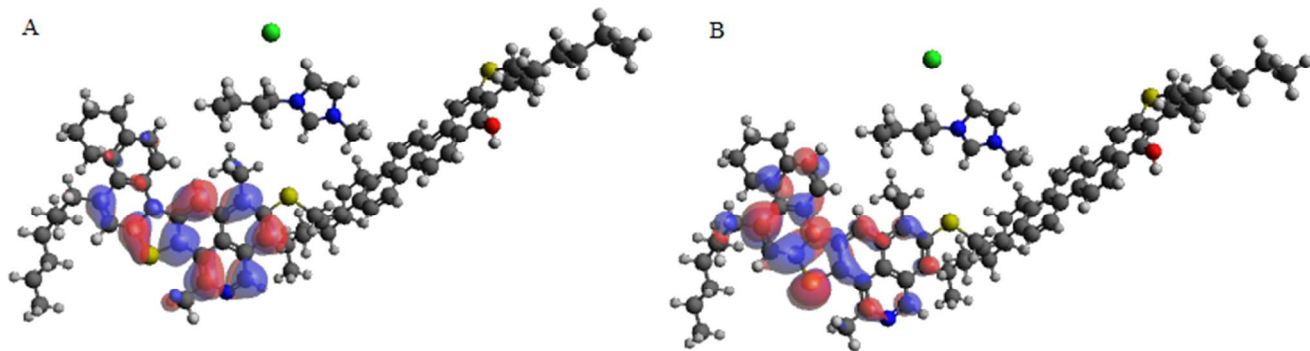

**Figure S9.** HOMO and LUMO locations of adduct formed between asphaltene (2) and 1-butyl-3-methylimidazolium chloride: (a) HOMO and (b) LUMO. Red, blue, yellow and grey colours represent oxygen, nitrogen, sulfur and carbon atoms respectively

**Table S2.** HOMO ( $E_H$ ) and LUMO ( $E_L$ ) energies for asphaltenes 2 and Asphaltene (2)-1-butyl-3-methylimidazolium chloride adduct.

| Compounds                                                  | $E_H$ (eV) | $E_L$ (eV) | Orbital Energy Gap. ( $E_G$ ) (eV) |
|------------------------------------------------------------|------------|------------|------------------------------------|
| Asphaltene (2)                                             | -3.88      | -2.70      | 1.18                               |
| Asphaltene (2)-1-butyl-3-methylimidazolium chloride adduct | -5.04      | 0.13       | 5.17                               |

**Table S3.** DFT molecular modelling thermodynamic data ( $\Delta H$  and  $\Delta G$ ) of asphaltenes (2) and adduct formed between 1-butyl-3-methylimidazolium chloride and asphaltene (2).

|                | $\Delta H$ (kcal.mol <sup>-1</sup> ) | $\Delta G$ (kcal.mol <sup>-1</sup> ) |
|----------------|--------------------------------------|--------------------------------------|
| Asphaltene (2) | $-29.3 \times 10^5$                  | $-26.3 \times 10^5$                  |

**Table S4.** DFT molecular modelling thermodynamic data ( $\Delta\Delta H$ ,  $\Delta\Delta G$  and  $\Delta\Delta S$ ) on the formation of adduct between 1-butyl-3-methylimidazolium chloride and asphaltenes (2).

|            | $\Delta\Delta H$ (kcal.mol <sup>-1</sup> ) | $\Delta\Delta G$ (kcal.mol <sup>-1</sup> ) | $\Delta\Delta S$ (cal.mol <sup>-1</sup> ) |
|------------|--------------------------------------------|--------------------------------------------|-------------------------------------------|
| Adduct (2) | $16.045 \times 10^3$                       | $16.058 \times 10^3$                       | -43.624                                   |

**Table S5.** Electrostatic charge transfer between 1-butyl-3-methylimidazolium chloride and asphaltenes

(2)

| 1-butyl-3-methylimidazolium chloride |                          |                         |
|--------------------------------------|--------------------------|-------------------------|
| Atom                                 | Before adduct was formed | After adduct was formed |
| N(1)                                 | -0.335                   | -0.424                  |
| N(2)                                 | -0.330                   | -0.419                  |
| Cl                                   | -0.863                   | -0.971                  |
| Asphaltenes (2)                      |                          |                         |
| Atom                                 | Before adduct was formed | After adduct was formed |
| S(1)                                 | 0.559                    | 0.688                   |
| S(2)                                 | 0.211                    | 0.216                   |
| S(3)                                 | 0.412                    | 0.379                   |
| N(1)                                 | -0.459                   | -0.492                  |
| O(1)                                 | -0.693                   | -0.770                  |
